# Supplementary material
Source: PubMed Central journal article supplement (PMC9589322)
Supplement: 00128-2022.SUPPLEMENT.pdf [file 00128-2022.SUPPLEMENT.pdf]

1 Supplementary tables

2

3

|                                             | Univariate logistic regression             |          |         |      |         | Multivariate logistic regression |          |         |      |         |
|---------------------------------------------|--------------------------------------------|----------|---------|------|---------|----------------------------------|----------|---------|------|---------|
|                                             | Relative risk                              | Std. Err | 95% CI. |      | p-Value | Relative risk                    | Std. Err | 95% CI. |      | p-Value |
| Ventilator treatment due to COVID-19        |                                            |          |         |      |         |                                  |          |         |      |         |
| Median FLUS score                           | 2.84                                       | 0.75     | 1.69    | 4.77 | <0.001  | 2.44                             | 0.77     | 1.31    | 4.52 | <0.001  |
| Age                                         | 1.00                                       | 0.01     | 0.97    | 1.03 | 0.96    | 1.00                             | 0.02     | 0.97    | 1.03 | 0.99    |
| Sex, Man                                    | 1.38                                       | 0.67     | 0.54    | 3.55 | 0.50    | 1.05                             | 0.50     | 0.41    | 2.66 | 0.92    |
| Oxygen administration                       | 3.63                                       | 1.79     | 1.38    | 9.54 | 0.01    | 1.75                             | 0.95     | 0.60    | 5.10 | 0.31    |
| Relevant comorbidity                        | All had comorbidity, omitted from analysis |          |         |      |         |                                  |          |         |      |         |
| Admission to intensive care due to COVID-19 |                                            |          |         |      |         |                                  |          |         |      |         |
| Median FLUS score                           | 2.85                                       | 0.73     | 1.73    | 4.71 | <0.001  | 2.55                             | 0.77     | 1.42    | 4.60 | <0.001  |
| Age                                         | 2.85                                       | 0.73     | 2.85    | 0.73 | 0.67    | 1.00                             | 0.01     | 0.97    | 1.03 | 0.93    |
| Sex, Man                                    | 1.60                                       | 0.74     | 0.64    | 3.95 | 0.31    | 1.27                             | 0.58     | 0.52    | 3.11 | 0.60    |
| Oxygen administration                       | 2.64                                       | 1.21     | 1.07    | 6.50 | 0.03    | 1.30                             | 0.64     | 0.50    | 3.43 | 0.59    |
| Relevant comorbidity                        | All had comorbidity, omitted from analysis |          |         |      |         |                                  |          |         |      |         |
| High-flow oxygen treatment                  |                                            |          |         |      |         |                                  |          |         |      |         |
| Median FLUS score                           | 2.06                                       | 0.27     | 1.59    | 2.66 | <0.001  | 1.53                             | 0.24     | 1.13    | 2.07 | 0.01    |
| Age                                         | 1.01                                       | 0.01     | 0.99    | 1.03 | 0.24    | 1.01                             | 0.01     | 1.00    | 1.03 | 0.15    |
| Sex, Man                                    | 1.64                                       | 0.43     | 0.98    | 2.74 | 0.06    | 1.24                             | 0.30     | 0.77    | 1.98 | 0.38    |
| Oxygen administration                       | 4.76                                       | 1.57     | 2.50    | 9.07 | <0.001  | 3.49                             | 1.21     | 1.76    | 6.90 | <0.001  |
| Relevant comorbidity                        | All had comorbidity, omitted from analysis |          |         |      |         |                                  |          |         |      |         |
| 30-day mortality due to COVID-19            |                                            |          |         |      |         |                                  |          |         |      |         |
| Median FLUS score                           | 1.77                                       | 0.37     | 1.17    | 2.67 | 0.01    | 1.14                             | 0.29     | 0.69    | 1.88 | 0.60    |

|                            |      |      |      |       |        |      |      |      |      |        |
|----------------------------|------|------|------|-------|--------|------|------|------|------|--------|
| Age                        | 1.07 | 0.02 | 1.04 | 1.11  | <0.001 | 1.08 | 0.02 | 1.04 | 1.11 | <0.001 |
| Sex, Man                   | 1.96 | 0.76 | 0.91 | 4.21  | 0.09   | 2.69 | 1.06 | 1.24 | 5.83 | 0.01   |
| Oxygen administration      | 3.00 | 1.14 | 1.42 | 6.32  | <0.001 | 2.71 | 1.10 | 1.22 | 6.02 | 0.01   |
| Relevant comorbidity       | 3.75 | 3.77 | 0.52 | 26.93 | 0.19   | 0.80 | 0.80 | 0.11 | 5.68 | 0.83   |
| 30-day all-cause mortality |      |      |      |       |        |      |      |      |      |        |
| Median FLUS score          | 1.51 | 0.24 | 1.10 | 2.06  | 0.01   | 0.96 | 0.22 | 0.61 | 1.51 | 0.85   |
| Age                        | 1.06 | 0.01 | 1.04 | 1.08  | <0.001 | 1.07 | 0.02 | 1.04 | 1.10 | <0.001 |
| Sex, Man                   | 1.18 | 0.33 | 0.69 | 2.03  | 0.54   | 2.33 | 0.79 | 1.20 | 4.55 | 0.01   |
| Oxygen administration      | 1.82 | 0.59 | 0.97 | 3.43  | 0.06   | 1.97 | 0.67 | 1.01 | 3.85 | 0.05   |
| Relevant comorbidity       | 2.02 | 1.16 | 0.65 | 6.25  | 0.22   | 0.74 | 0.50 | 0.20 | 2.75 | 0.65   |

4 Supplementary e-table 1: Uni- and multivariate logistic regression of pre-analytic selected variables and  
5 their relative risk for 30-days mortality due to COVID-19, 30-days all-cause mortality, intensive care  
6 admission, ventilator treatment, high-flow oxygen treatment and non-high-flow oxygen administration.

7

| FLUS score = 3 in any of the scanning zones |                     |          |         |       |         |
|---------------------------------------------|---------------------|----------|---------|-------|---------|
| Ventilator treatment due to COVID-19        |                     |          |         |       |         |
|                                             | Relative Risk       | Std. Err | 95% CI. |       | p-Value |
| Univariate logistic regression              |                     |          |         |       |         |
| FLUS score =3                               | 5.42                | 2.67     | 2.06    | 14.25 | 0.00    |
| Multivariate logistic regression            |                     |          |         |       |         |
| FLUS score =3                               | 3.54                | 1.84     | 1.27    | 9.83  | 0.02    |
| Age                                         | 1.00                | 0.02     | 0.97    | 1.03  | 0.92    |
| Sex, Man                                    | 1.11                | 0.52     | 0.45    | 2.79  | 0.82    |
| Oxygen administration                       | 2.33                | 1.21     | 0.84    | 6.45  | 0.10    |
| Relevant comorbidity                        | All had comorbidity |          |         |       |         |
| Admission to intensive care                 |                     |          |         |       |         |
|                                             | Relative Risk       | Std. Err | 95% CI. |       | p-Value |
| Univariate logistic regression              |                     |          |         |       |         |
| FLUS score =3                               | 5.60                | 2.68     | 2.19    | 14.30 | 0.00    |
| Multivariate logistic regression            |                     |          |         |       |         |
| FLUS score =3                               | 3.86                | 1.92     | 1.46    | 10.21 | 0.01    |
| Age                                         | 1.00                | 0.02     | 0.97    | 1.03  | 0.94    |
| Sex, Man                                    | 1.39                | 0.62     | 0.58    | 3.35  | 0.47    |
| Oxygen administration                       | 1.74                | 0.82     | 0.69    | 4.39  | 0.24    |
| Relevant comorbidity                        | All had comorbidity |          |         |       |         |
| High-flow oxygen treatment due to COVID-19  |                     |          |         |       |         |
|                                             | Relative Risk       | Std. Err | 95% CI. |       | p-Value |
| Univariate logistic regression              |                     |          |         |       |         |
| FLUS score =3                               | 2.75                | 0.69     | 1.68    | 4.48  | 0.00    |
| Multivariate logistic regression            |                     |          |         |       |         |
| FLUS score =3                               | 1.62                | 0.39     | 1.01    | 2.59  | 0.05    |
| Age                                         | 1.01                | 0.01     | 1.00    | 1.03  | 0.10    |
| Sex, Man                                    | 1.33                | 0.32     | 0.83    | 2.12  | 0.24    |
| Oxygen administration                       | 4.20                | 1.41     | 2.17    | 8.11  | 0.00    |
| Relevant comorbidity                        | All had comorbidity |          |         |       |         |
| 30-day mortality due to COVID-19            |                     |          |         |       |         |
|                                             | Relative Risk       | Std. Err | 95% CI. |       | p-Value |
| Univariate logistic regression              |                     |          |         |       |         |
| FLUS score =3                               | 2.65                | 0.95     | 1.31    | 5.35  | 0.01    |
| Multivariate logistic regression            |                     |          |         |       |         |
| FLUS score =3                               | 1.87                | 0.65     | 0.94    | 3.70  | 0.07    |
| Age                                         | 1.08                | 0.02     | 1.05    | 1.12  | 0.00    |
| Sex, Man                                    | 2.91                | 1.14     | 1.34    | 6.29  | 0.01    |
| Oxygen administration                       | 2.59                | 1.00     | 1.21    | 5.53  | 0.01    |
| Relevant comorbidity                        | 0.73                | 0.73     | 0.10    | 5.19  | 0.75    |

| 30-day all-cause mortality       |               |          |         |      |         |
|----------------------------------|---------------|----------|---------|------|---------|
|                                  | Relative Risk | Std. Err | 95% CI. |      | p-Value |
| Univariate logistic regression   |               |          |         |      |         |
| FLUS score =3                    | 2.04          | 0.56     | 1.19    | 3.48 | 0.01    |
| Multivariate logistic regression |               |          |         |      |         |
| FLUS score =3                    | 1.65          | 0.53     | 0.88    | 3.11 | 0.12    |
| Age                              | 1.07          | 0.02     | 1.04    | 1.10 | 0.00    |
| Sex, Man                         | 2.35          | 0.80     | 1.21    | 4.56 | 0.01    |
| Oxygen administration            | 1.73          | 0.57     | 0.91    | 3.29 | 0.09    |
| Relevant comorbidity             | 0.67          | 0.46     | 0.18    | 2.54 | 0.56    |

8 Supplementary e-table 2: Relative risk from uni- and multivariate binary regression analysis of FLUS score >  
9 3 in any of the scanning zones.

10

11

| Count of FLUS zones scoring 3              |                     |          |         |      |         |
|--------------------------------------------|---------------------|----------|---------|------|---------|
| Ventilator treatment due to COVID-19       |                     |          |         |      |         |
|                                            | Relative Risk       | Std. Err | 95% CI. |      | p-Value |
| Univariate logistic regression             |                     |          |         |      |         |
| FLUS score, RR increase by number of zones | 1.37                | 0.11     | 1.18    | 1.59 | 0.00    |
| Multivariate logistic regression           |                     |          |         |      |         |
| FLUS score, RR increase by number of zones | 1.00                | 0.02     | 0.97    | 1.04 | 0.77    |
| Age                                        | 0.98                | 0.46     | 0.39    | 2.47 | 0.96    |
| Sex, Man                                   | 2.75                | 1.33     | 1.06    | 7.11 | 0.04    |
| Oxygen administration                      | 1.37                | 0.11     | 1.18    | 1.59 | 0.00    |
| Relevant comorbidity                       |                     |          |         |      |         |
| Admission to intensive care                |                     |          |         |      |         |
|                                            | Relative Risk       | Std. Err | 95% CI. |      | p-Value |
| Univariate logistic regression             |                     |          |         |      |         |
| FLUS score, RR increase by number of zones | 1.48                | 0.05     | 1.40    | 1.58 | 0.00    |
| Multivariate logistic regression           |                     |          |         |      |         |
| FLUS score, RR increase by number of zones | 1.46                | 0.10     | 1.29    | 1.66 | 0.00    |
| Age                                        | 1.00                | 0.02     | 0.98    | 1.03 | 0.77    |
| Sex, Man                                   | 1.14                | 0.46     | 0.52    | 2.50 | 0.75    |
| Oxygen administration                      | 1.76                | 0.72     | 0.79    | 3.92 | 0.17    |
| Relevant comorbidity                       |                     |          |         |      |         |
| High-flow oxygen treatment due to COVID-19 |                     |          |         |      |         |
|                                            | Relative Risk       | Std. Err | 95% CI. |      | p-Value |
| Univariate logistic regression             |                     |          |         |      |         |
| FLUS score, RR increase by number of zones | 1.45                | 0.14     | 1.21    | 1.75 | 0.00    |
| Multivariate logistic regression           |                     |          |         |      |         |
| FLUS score, RR increase by number of zones | 1.62                | 0.39     | 1.01    | 2.59 | 0.05    |
| Age                                        | 1.01                | 0.01     | 1.00    | 1.03 | 0.10    |
| Sex, Man                                   | 1.33                | 0.32     | 0.83    | 2.12 | 0.24    |
| Oxygen administration                      | 4.20                | 1.41     | 2.17    | 8.11 | 0.00    |
| Relevant comorbidity                       | All had comorbidity |          |         |      |         |
| 30-day mortality due to COVID-19           |                     |          |         |      |         |
|                                            | Odds Ratio          | Std. Err | 95% CI. |      | p-Value |
| Univariate logistic regression             |                     |          |         |      |         |
| FLUS score, RR increase by                 | 1.16                | 0.11     | 0.97    | 1.39 | 0.109   |

|                                            |              |          |         |      |         |
|--------------------------------------------|--------------|----------|---------|------|---------|
| number of zones                            |              |          |         |      |         |
| Multivariate logistic regression           |              |          |         |      |         |
| FLUS score, RR increase by number of zones | 1.10         | 0.11     | 0.9     | 135  | 0.353   |
| Age                                        | 1.08         | 0.02     | 1.04    | 1.12 | 0       |
| Sex, Man                                   | 2.75         | 1.08     | 1.27    | 5.95 | 0.01    |
| Oxygen administration                      | 2.75         | 1.05     | 1.3     | 5.83 | 0.008   |
| Relevant comorbidity                       | 0.79         | 0.79     | 0.11    | 5.61 | 0.82    |
| 30-day all-cause mortality                 |              |          |         |      |         |
|                                            | Relativ Risk | Std. Err | 95% CI. |      | p-Value |
| Univariate logistic regression             |              |          |         |      |         |
| FLUS score, RR increase by number of zones | 1.13         | 0.08     | 0.98    | 1.3  | 0.097   |
| Multivariate logistic regression           |              |          |         |      |         |
| FLUS score, RR increase by number of zones | 1.08         | 0.11     | 0.89    | 1.31 | 0.45    |
| Age                                        | 1.07         | 0.02     | 1.03    | 1.09 | <0.001  |
| Sex, Man                                   | 2.29         | 0.78     | 1.78    | 4.46 | 0.015   |
| Oxygen administration                      | 1.89         | 0.6      | 0.97    | 3.44 | 0.06    |
| Relevant comorbidity                       | 0.71         | 0.48     | 0.19    | 2.68 | 0.62    |

12 Supplementary e-table 3: Relative for outcomes using a FLUS scoring system counting number of zones  
13 with a score on three.

14

| Count of FLUS zones scoring 2              |                     |          |         |      |         |
|--------------------------------------------|---------------------|----------|---------|------|---------|
| Ventilator treatment due to COVID-19       |                     |          |         |      |         |
|                                            | Relative Risk       | Std. Err | 95% CI. |      | p-Value |
| Univariate logistic regression             |                     |          |         |      |         |
| FLUS score, RR increase by number of zones | 1.31                | 0.09     | 1.14    | 1.5  | <0.001  |
| Multivariate logistic regression           |                     |          |         |      |         |
| FLUS score, RR increase by number of zones | 1.37                | 0.11     | 1.18    | 1.61 | <0.001  |
| Age                                        | 0.99                | 0.02     | 0.97    | 1.02 | 0.496   |
| Sex, Man                                   | 1.31                | 0.60     | 0.53    | 3.23 | 0.553   |
| Oxygen administration                      | 2.97                | 1.40     | 1.18    | 7.05 | 0.02    |
| Relevant comorbidity                       | All had comorbidity |          |         |      |         |
| Admission to intensive care                |                     |          |         |      |         |
|                                            | Relative Risk       | Std. Err | 95% CI. |      | p-Value |
| Univariate logistic regression             |                     |          |         |      |         |
| FLUS score, RR increase by number of zones | 1.3                 | 0.08     | 1.14    | 1.47 | <0.001  |
| Multivariate logistic regression           |                     |          |         |      |         |
| FLUS score, RR increase by number of zones | 1.39                | 0.08     | 1.22    | 1.56 | <0.001  |
| Age                                        | 0.99                | 0.01     | 0.96    | 1.01 | 0.324   |
| Sex, Man                                   | 1.55                | 0.68     | 0.65    | 3.66 | 0.313   |
| Oxygen administration                      | 2.29                | 0.99     | 0.97    | 5.38 | 0.057   |
| Relevant comorbidity                       | All had comorbidity |          |         |      |         |
| High-flow oxygen treatment due to COVID-19 |                     |          |         |      |         |
|                                            | Relative Risk       | Std. Err | 95% CI. |      | p-Value |
| Univariate logistic regression             |                     |          |         |      |         |
| FLUS score, RR increase by number of zones | 1.31                | 0.07     | 1.17    | 1.47 | <0.001  |
| Multivariate logistic regression           |                     |          |         |      |         |
| FLUS score, RR increase by number of zones | 1.59                | 0.07     | 1.02    | 1.31 | 0.01    |
| Age                                        | 1.01                | 0.01     | 0.99    | 1.03 | 0.23    |
| Sex, Man                                   | 1.27                | 0.29     | 0.8     | 2.02 | 0.302   |
| Oxygen administration                      | 4.01                | 1.36     | 2.07    | 7.8  | <0.001  |
| Relevant comorbidity                       | All had comorbidity |          |         |      |         |
| 30-day mortality due to COVID-19           |                     |          |         |      |         |
|                                            | Relative Risk       | Std. Err | 95% CI. |      | p-Value |
| Univariate logistic regression             |                     |          |         |      |         |
| FLUS score, RR increase by                 | 1.15                | 0.08     | 0.99    | 1.32 | 0.06    |

|                                            |               |          |         |      |         |
|--------------------------------------------|---------------|----------|---------|------|---------|
| number of zones                            |               |          |         |      |         |
| Multivariate logistic regression           |               |          |         |      |         |
| FLUS score, RR increase by number of zones | 0.99          | 0.09     | 0.82    | 1.18 | 0.88    |
| Age                                        | 1.08          | 0.02     | 1.04    | 1.11 | <0.001  |
| Sex, Man                                   | 2.84          | 1.12     | 1.31    | 6.16 | 0.008   |
| Oxygen administration                      | 3             | 1.13     | 1.43    | 6.29 | 0.004   |
| Relevant comorbidity                       | 0.8           | 0.8      | 0.11    | 5.72 | 0.825   |
| 30-day all-cause mortality                 |               |          |         |      |         |
|                                            | Relative Risk | Std. Err | 95% CI. |      | p-Value |
| Univariate logistic regression             |               |          |         |      |         |
| FLUS score, RR increase by number of zones | 1.10          | 0.06     | 0.98    | 1.24 | 0.099   |
| Multivariate logistic regression           |               |          |         |      |         |
| FLUS score, RR increase by number of zones | 0.94          | 0.07     | 0.79    | 1.11 | 0.46    |
| Age                                        | 1.07          | 0.02     | 1.04    | 1.10 | <0.001  |
| Sex, Man                                   | 2.38          | 0.8      | 1.22    | 4.61 | 0.011   |
| Oxygen administration                      | 2.02          | 0.64     | 1.08    | 3.77 | 0.028   |
| Relevant comorbidity                       | 0.67          | 0.44     | 0.19    | 2.45 | 0.548   |

15 Supplementary e-table 4: Relative risk of a FLUS scoring system counting number of zones with a score on  
16 3.

17



| FLUS total sum of all zones                |                     |          |         |      |         |
|--------------------------------------------|---------------------|----------|---------|------|---------|
| Ventilator treatment due to COVID-19       |                     |          |         |      |         |
|                                            | Relative Risk       | Std. Err | 95% CI. |      | p-Value |
| Univariate logistic regression             |                     |          |         |      |         |
| FLUS score                                 | 1.13                | 0.02     | 1.09    | 1.17 | <0.001  |
|                                            |                     |          |         |      |         |
| FLUS score                                 | 1.12                | 0.03     | 1.07    | 1.19 | <0.001  |
| Age                                        | 1                   | 0.02     | 0.97    | 1.03 | 0.97    |
| Sex, Man                                   | 0.91                | 0.41     | 0.38    | 2.19 | 0.83    |
| Oxygen administration                      | 2.52                | 1.18     | 1.01    | 6.29 | 0.05    |
| Relevant comorbidity                       | All had comorbidity |          |         |      |         |
| Admission to intensive care                |                     |          |         |      |         |
|                                            | Relative Risk       | Std. Err | 95% CI. |      | p-Value |
| Univariate logistic regression             |                     |          |         |      |         |
| FLUS score                                 | 1.13                | 0.01     | 1.11    | 1.16 | <0.001  |
| Multivariate logistic regression           |                     |          |         |      |         |
| FLUS score                                 | 1.14                | 0.02     | 1.10    | 1.19 | <0.001  |
| Age                                        | 0.99                | 0.01     | 0.97    | 1.03 | 0.97    |
| Sex, Man                                   | 1.18                | 0.44     | 0.57    | 2.46 | 0.65    |
| Oxygen administration                      | 1.89                | 0.8      | 0.83    | 4.31 | 0.13    |
| Relevant comorbidity                       | All had comorbidity |          |         |      |         |
| High-flow oxygen treatment due to COVID-19 |                     |          |         |      |         |
|                                            | Relativ Risk        | Std. Err | 95% CI. |      | p-Value |
| Univariate logistic regression             |                     |          |         |      |         |
| FLUS score                                 | 1.09                | 0.02     | 1.05    | 1.13 | <0.001  |
| Multivariate logistic regression           |                     |          |         |      |         |
| FLUS score                                 | 1.05                | 0.02     | 1.02    | 1.1  | 0.006   |
| Age                                        | 1.01                | 0.01     | 0.99    | 1.03 | 0.19    |
| Sex, Man                                   | 1.18                | 0.29     | 0.73    | 1.9  | 0.5     |
| Oxygen administration                      | 3.74                | 1.28     | 1.91    | 7.31 | <0.001  |
| Relevant comorbidity                       | All had comorbidity |          |         |      |         |
| 30-day mortality due to COVID-19           |                     |          |         |      |         |
|                                            | Odds Ratio          | Std. Err | 95% CI. |      | p-Value |
| Univariate logistic regression             |                     |          |         |      |         |
| FLUS score                                 | 1.05                | 0.02     | 1       | 1.1  | 0.03    |
| Multivariate logistic regression           |                     |          |         |      |         |
| FLUS score                                 | 1.02                | 0.03     | 0.96    | 1.08 | 0.6     |
| Age                                        | 1.08                | 0.02     | 1.04    | 1.11 | <0.001  |
| Sex, Man                                   | 2.72                | 1.08     | 1.26    | 5.92 | 0.01    |
| Oxygen administration                      | 2.84                | 1.09     | 1.34    | 6.02 | 0.006   |
| Relevant comorbidity                       | 0.83                | 0.83     | 0.12    | 5.92 | 0.85    |

| 30-day all-cause mortality       |              |          |         |      |         |
|----------------------------------|--------------|----------|---------|------|---------|
|                                  | Relativ Risk | Std. Err | 95% CI. |      | p-Value |
| Univariate logistic regression   |              |          |         |      |         |
| FLUS score                       | 1.04         | 0.02     | 1       | 1.08 | 0.03    |
| Multivariate logistic regression |              |          |         |      |         |
| FLUS score                       | 0.99         | 0.02     | 0.94    | 1.04 | 0.66    |
| Age                              | 1.07         | 0.02     | 1.04    | 1.09 | <0.001  |
| Sex, Man                         | 2.35         | 0.8      | 1.21    | 4.57 | 0.012   |
| Oxygen administration            | 1.98         | 0.64     | 1.05    | 3.73 | 0.04    |
| Relevant comorbidity             | 0.72         | 0.48     | 0.2     | 2.66 | 0.63    |

18 Supplementary e-table 5: Relative risk of a FLUS scoring system counting sum of zones.

19

| FLUS for anterior and lateral scanning zones |                              |          |         |      |         |
|----------------------------------------------|------------------------------|----------|---------|------|---------|
| Mechanical ventilation due to COVID-19       |                              |          |         |      |         |
|                                              | Relative Risk                | Std. Err | 95% CI. |      | p-Value |
| Univariate logistic regression               |                              |          |         |      |         |
| FLUS score                                   | 2.87                         | 0.76     | 1.71    | 4.83 | <0.001  |
| Multivariate logistic regression             |                              |          |         |      |         |
| FLUS score                                   | 2.49                         | 0.78     | 1.35    | 4.6  | 0.003   |
| Age                                          | 1                            | 0.01     | 0.97    | 1.03 | 0.982   |
| Sex, Man                                     | 1.04                         | 0.5      | 0.41    | 2.66 | 0.923   |
| Oxygen administration                        | 1.72                         | 0.93     | 0.6     | 4.98 | 0.314   |
| Relevant comorbidity                         | All had relevant comorbidity |          |         |      |         |
| Admission to intensive care                  |                              |          |         |      |         |
|                                              | Relative Risk                | Std. Err | 95% CI. |      | p-Value |
| Univariate logistic regression               |                              |          |         |      |         |
| FLUS score                                   | 2.96                         | 0.76     | 1.79    | 4.89 | <0.001  |
| Multivariate logistic regression             |                              |          |         |      |         |
| FLUS score                                   | 2.7                          | 0.8      | 1.5     | 4.84 | 0.001   |
| Age                                          | 1                            | 0.01     | 0.97    | 1.03 | 0.951   |
| Sex, Man                                     | 1.27                         | 0.58     | 0.52    | 3.1  | 0.598   |
| Oxygen administration                        | 1.21                         | 0.61     | 0.48    | 3.24 | 0.644   |
| Relevant comorbidity                         | All had relevant comorbidity |          |         |      |         |
| High-flow oxygen treatment due to COVID-19   |                              |          |         |      |         |
|                                              | Relative Risk                | Std. Err | 95% CI. |      | p-Value |
| Univariate logistic regression               |                              |          |         |      |         |
| FLUS score                                   | 2.05                         | 0.28     | 1.59    | 2.66 | <0.001  |
| Multivariate logistic regression             |                              |          |         |      |         |
| FLUS score                                   | 1.52                         | 0.23     | 1.16    | 2.06 | 0.006   |
| Age                                          | 1.01                         | 0.01     | 1       | 1.02 | 0.153   |
| Sex, Man                                     | 1.24                         | 0.29     | 0.77    | 1.97 | 0.372   |
| Oxygen administration                        | 3.5                          | 1.21     | 1.77    | 6.91 | <0.001  |
| Relevant comorbidity                         | All had relevant comorbidity |          |         |      |         |
| 30-day mortality due to COVID-19             |                              |          |         |      |         |
|                                              | Relative Risk                | Std. Err | 95% CI. |      | p-Value |
| Univariate logistic regression               |                              |          |         |      |         |
| FLUS score                                   | 1.76                         | 0.37     | 1.17    | 2.66 | 0.007   |
| Multivariate logistic regression             |                              |          |         |      |         |
| FLUS score                                   | 1.16                         | 0.29     | 0.71    | 1.90 | 0.553   |
| Age                                          | 1.07                         | 0.02     | 1.04    | 1.11 | <0.001  |
| Sex, Man                                     | 2.67                         | 1.05     | 1.23    | 5.8  | 0.013   |
| Oxygen administration                        | 2.68                         | 1.09     | 1.2     | 5.95 | 0.013   |
| Relevant comorbidity                         | 0.79                         | 0.79     | 0.11    | 5.58 | 0.812   |

| 30-day all-cause mortality       |               |          |         |      |         |
|----------------------------------|---------------|----------|---------|------|---------|
|                                  | Relative Risk | Std. Err | 95% CI. |      | p-Value |
| Univariate logistic regression   |               |          |         |      |         |
| FLUS score                       | 1.51          | 0.23     | 1.1     | 2.06 | 0.01    |
| Multivariate logistic regression |               |          |         |      |         |
| FLUS score                       | 0.99          | 0.22     | 0.63    | 1.56 | 0.982   |
| Age                              | 1.07          | 0.02     | 1.04    | 1.09 | <0.001  |
| Sex, Man                         | 2.31          | 0.79     | 1.18    | 4.51 | 0.014   |
| Oxygen administration            | 1.93          | 0.66     | 0.98    | 3.78 | 0.056   |
| Relevant comorbidity             | 0.73          | 0.5      | 0.2     | 2.76 | 0.65    |

20 Supplementary e-table 6: FLUS from anterior and lateral scanning zones without dorsal zones.

21

|                                             | Univariate logistic regression  |          |         |       |         | Multivariate logistic regression                                              |          |         |       |         |
|---------------------------------------------|---------------------------------|----------|---------|-------|---------|-------------------------------------------------------------------------------|----------|---------|-------|---------|
|                                             | Relative risk                   | Std. Err | 95% CI. |       | p-Value | Relative risk                                                                 | Std. Err | 95% CI. |       | p-Value |
| Ventilator treatment due to COVID-19        |                                 |          |         |       |         |                                                                               |          |         |       |         |
| FLUS score                                  | 1.90                            | 0.62     | 1.01    | 3.59  | 0.05    | 1.89                                                                          | 0.62     | 1.00    | 3.59  | 0.05    |
| Age                                         | 0.99                            | 0.02     | 0.96    | 1.03  | 0.71    | 1.00                                                                          | 0.02     | 0.96    | 1.03  | 0.81    |
| Sex, Man                                    | 1.07                            | 0.56     | 0.39    | 2.96  | 0.90    | 0.96                                                                          | 0.50     | 0.34    | 2.69  | 0.94    |
| Oxygen administration                       | 3.03                            | 1.92     | 0.88    | 10.49 | 0.08    | Omitted because of collinearity                                               |          |         |       |         |
| Relevant comorbidity                        | Omitted because of collinearity |          |         |       |         |                                                                               |          |         |       |         |
| Admission to intensive care due to COVID-19 |                                 |          |         |       |         |                                                                               |          |         |       |         |
| FLUS score                                  | 2.00                            | 0.63     | 1.08    | 3.72  | 0.03    | 1.98                                                                          | 0.63     | 1.06    | 3.69  | 0.03    |
| Age                                         | 0.99                            | 0.02     | 0.96    | 1.03  | 0.74    | 1.00                                                                          | 0.02     | 0.96    | 1.03  | 0.88    |
| Sex, Man                                    | 1.21                            | 0.61     | 0.45    | 3.27  | 0.70    | 1.12                                                                          | 0.57     | 0.41    | 3.04  | 0.83    |
| Oxygen administration                       | 3.18                            | 2.00     | 0.93    | 10.91 | 0.07    | Omitted because of collinearity                                               |          |         |       |         |
| Relevant comorbidity                        | Omitted because of collinearity |          |         |       |         |                                                                               |          |         |       |         |
| High-flow oxygen treatment                  |                                 |          |         |       |         |                                                                               |          |         |       |         |
| FLUS score                                  | 1.68                            | 0.24     | 1.28    | 2.22  | <0.001  | Omitted because no patients in this group received high-flow oxygen treatment |          |         |       |         |
| Age                                         | 1.01                            | 0.01     | 1.00    | 1.03  | 0.14    |                                                                               |          |         |       |         |
| Sex, Man                                    | 1.40                            | 0.35     | 0.86    | 2.27  | 0.18    |                                                                               |          |         |       |         |
| Oxygen administration                       | 3.04                            | 0.98     | 1.62    | 5.70  | <0.001  |                                                                               |          |         |       |         |
| Relevant comorbidity                        |                                 |          |         |       |         |                                                                               |          |         |       |         |
| 30-day mortality due to COVID-19            |                                 |          |         |       |         |                                                                               |          |         |       |         |
| FLUS score                                  | 1.69                            | 0.45     | 1.00    | 2.85  | 0.05    | 1.33                                                                          | 0.39     | 0.75    | 2.37  | 0.33    |
| Age                                         | 1.06                            | 0.02     | 1.02    | 1.10  | <0.001  | 1.07                                                                          | 0.02     | 1.03    | 1.11  | <0.001  |
| Sex, Man                                    | 3.14                            | 1.70     | 1.09    | 9.07  | 0.03    | 5.13                                                                          | 3.09     | 1.58    | 16.69 | 0.01    |
| Oxygen administration                       | 2.97                            | 1.61     | 1.02    | 8.62  | 0.05    | 2.60                                                                          | 1.41     | 0.90    | 7.51  | 0.08    |
| Relevant                                    | All had comorbidity             |          |         |       |         | All had comorbidity                                                           |          |         |       |         |

|                            |                     |      |      |      |        |                     |      |      |       |        |
|----------------------------|---------------------|------|------|------|--------|---------------------|------|------|-------|--------|
| comorbidity                |                     |      |      |      |        |                     |      |      |       |        |
| 30-day all-cause mortality |                     |      |      |      |        |                     |      |      |       |        |
| FLUS score                 | 1.69                | 0.45 | 1.00 | 2.85 | 0.05   | 1.33                | 0.39 | 0.75 | 2.37  | 0.33   |
| Age                        | 1.06                | 0.02 | 1.02 | 1.10 | <0.001 | 1.07                | 0.02 | 1.03 | 1.11  | <0.001 |
| Sex, Man                   | 3.14                | 1.70 | 1.09 | 9.07 | 0.03   | 5.13                | 3.09 | 1.58 | 16.69 | 0.01   |
| Oxygen administration      | 2.97                | 1.61 | 1.02 | 8.62 | 0.05   | 2.60                | 1.41 | 0.90 | 7.51  | 0.08   |
| Co-morbidity               | All had comorbidity |      |      |      |        | All had comorbidity |      |      |       |        |

22 Supplementary e-table 7: Prediction analysis based on the subgroup who were known COVID-19 positive  
23 before the FLUS examination was performed.

24

|                                             | Univariate logistic regression  |          |         |       |         | Multivariate logistic regression |          |         |       |         |
|---------------------------------------------|---------------------------------|----------|---------|-------|---------|----------------------------------|----------|---------|-------|---------|
|                                             | Relative risk                   | Std. Err | 95% CI. |       | p-Value | Relative risk                    | Std. Err | 95% CI. |       | p-Value |
| Ventilator treatment due to COVID-19        |                                 |          |         |       |         |                                  |          |         |       |         |
| FLUS score                                  | 3.76                            | 1.78     | 1.48    | 9.51  | 0.01    | 7.70                             | 5.57     | 1.87    | 31.77 | <0.001  |
| Age                                         | 1.00                            | 0.03     | 0.95    | 1.06  | 1       | 0.95                             | 0.04     | 0.87    | 1.04  | 0.25    |
| Sex, Man                                    | 1.17                            | 1.16     | 0.17    | 8.16  | 0.87    | 1.15                             | 1.25     | 0.13    | 9.75  | 0.90    |
| Oxygen administration                       | Omitted because of collinearity |          |         |       |         | Omitted because of collinearity  |          |         |       |         |
| Relevant comorbidity                        | 1.01                            | 1.15     | 0.11    | 9.45  | 1.00    |                                  |          |         |       |         |
| Admission to intensive care due to COVID-19 |                                 |          |         |       |         |                                  |          |         |       |         |
| FLUS score                                  | 3.11                            | 1.20     | 1.46    | 6.63  | <0.001  | 3.56                             | 1.49     | 1.57    | 8.08  | <0.001  |
| Age                                         | 1.00                            | 0.02     | 0.96    | 1.05  | 0.90    | 0.98                             | 0.03     | 0.93    | 1.03  | 0.41    |
| Sex, Man                                    | 1.14                            | 0.92     | 0.24    | 5.49  | 0.87    | 0.86                             | 0.65     | 0.19    | 3.82  | 0.84    |
| Oxygen administration                       | Omitted because of collinearity |          |         |       |         | Omitted because of collinearity  |          |         |       |         |
| Relevant comorbidity                        | 0.72                            | 0.61     | 0.14    | 3.81  | 0.70    |                                  |          |         |       |         |
| 30-day mortality due to COVID-19            |                                 |          |         |       |         |                                  |          |         |       |         |
| FLUS score                                  | 1.38                            | 0.74     | 0.48    | 3.96  | 0.55    | 0.67                             | 0.56     | 0.13    | 3.41  | 0.63    |
| Age                                         | 1.09                            | 0.04     | 1.02    | 1.17  | 0.01    | 1.09                             | 0.04     | 1.02    | 1.16  | 0.01    |
| Sex, Man                                    | 0.68                            | 0.48     | 0.17    | 2.74  | 0.58    | 0.93                             | 0.64     | 0.24    | 3.61  | 0.92    |
| Oxygen administration                       | 9.50                            | 6.07     | 2.72    | 33.22 | <0.001  | 3.23                             | 2.15     | 0.87    | 11.91 | 0.08    |
| Relevant comorbidity                        | 2.56                            | 2.70     | 0.32    | 20.24 | 0.37    | Omitted because of collinearity  |          |         |       |         |
| 30-day all-cause mortality                  |                                 |          |         |       |         |                                  |          |         |       |         |
| FLUS score                                  | 1.82                            | 0.35     | 1.25    | 2.64  | <0.001  | 0.33                             | 0.21     | 0.10    | 1.12  | 0.08    |
| Age                                         | 1.06                            | 0.01     | 1.03    | 1.09  | <0.001  | 1.07                             | 0.02     | 1.03    | 1.11  | <0.001  |
| Sex, Man                                    | 0.69                            | 0.26     | 0.33    | 1.43  | 0.32    | 1.06                             | 0.47     | 0.45    | 2.52  | 0.89    |
| Oxygen administration                       | 4.65                            | 2.63     | 1.54    | 14.07 | 0.01    | 2.46                             | 0.96     | 1.14    | 5.27  | 0.02    |
| Relevant                                    | 2.69                            | 1.58     | 0.85    | 8.51  | 0.09    | 0.98                             | 0.68     | 0.25    | 3.80  | 0.98    |

|             |  |  |  |  |  |  |  |  |  |  |
|-------------|--|--|--|--|--|--|--|--|--|--|
| comorbidity |  |  |  |  |  |  |  |  |  |  |
|-------------|--|--|--|--|--|--|--|--|--|--|

25 Supplementary e-table 8: Prediction analysis based on the subgroup who had unknown COVID-19 status at  
26 the time point the FLUS examination was performed. Analysis of high-flow oxygen treatment is omitted  
27 because no patient received this treatment in this subgroup.

28



| Zone    | N  | Agreement | Expected agreement | Kappa | p-value |
|---------|----|-----------|--------------------|-------|---------|
| Right 1 | 25 | 64.00%    | 40.80%             | 0.39  | <0.001  |
| Right 2 | 25 | 68.00%    | 34.40%             | 0.51  | <0.001  |
| Right 3 | 25 | 64.00%    | 29.44%             | 0.49  | <0.001  |
| Right 4 | 25 | 72.00%    | 40.48%             | 0.53  | <0.001  |
| Right 5 | 11 | 63.64%    | 40.50%             | 0.39  | 0.04    |
| Right 6 | 11 | 72.73%    | 60.33%             | 0.31  | 0.05    |
| Right 7 | 11 | 63.64%    | 48.76%             | 0.29  | 0.05    |
| Left 1  | 25 | 68.00%    | 40.80%             | 0.46  | <0.001  |
| Left 2  | 25 | 80.00%    | 48.32%             | 0.61  | <0.001  |
| Left 3  | 22 | 36.36%    | 26.45%             | 0.14  | 0.13    |
| Left 4  | 23 | 65.22%    | 35.73%             | 0.46  | <0.001  |
| Left 5  | 11 | 54.55%    | 47.11%             | 0.14  | 0.26    |
| Left 6  | 11 | 72.73%    | 61.98%             | 0.28  | 0.09    |
| Left 7  | 11 | 72.73%    | 74.38%             | -0.06 | 0.69    |

29 Supplementary table e9: Agreement and kappa values from the scanning zone. Rated by two independent  
30 readers on randomly selected patients.
